# Supplementary material
Source: PubMed Central journal article supplement (PMC2976239)
Supplement: supp_76_21_7299__1.pdf [file supp_76_21_7299__1.pdf]

1 Supporting Material for “Analysis of the metabolic pathway in *Lactobacillus*.”

2

3 Masahiro Kuratsu<sup>1</sup>, Yoshimitsu Hamano,<sup>2</sup> and Tohru Dairi<sup>3</sup>

4

5 *Kyowa Hakko Bio Co. Ltd., Chiyoda-ku, Tokyo 100-8185, Japan,* <sup>1</sup> *Department of*  
6 *Bioscience, Fukui Prefectural University, Fukui 910-1195, Japan,* <sup>2</sup> *Graduate School of*  
7 *Engineering, Hokkaido University, Hokkaido 060-8628, Japan.* <sup>3</sup>

8

9 1. Supporting Materials and Methods.

10 2. Supporting Table 1 to 4.

11 3. Supporting Figures 1–3.

12 4. References.

13

14 **1. Supporting Materials and Methods.**

15 **Chemicals.** All chemicals added into the medium were analytical grade.

16 **Bacterial strains.** *L. fermentum* IFO 3956 was obtained from the Biological  
17 Resource Center, National Institute of Technology and Evaluation, Japan. *L. reuteri*  
18 JCM 1112 and *L. brevis* ATCC 367 were obtained from the Japan Collection of  
19 Microorganisms (RIKEN BioResource Center).

20 **Ortholog search.** The Kyoto encyclopedia of genes and genomes (KEGG)  
21 pathway database (<http://www.genome.jp/kegg/pathway.html>) was used for the first  
22 screening of the presence or absence of an ortholog that participates in the known  
23 primary metabolic pathways in *Lactobacillus* strains. As for the genes that were absent  
24 in *Lactobacillus* strains in the KEGG pathway, the detailed analyses using BLAST  
25 searches (1) with the genes of *Escherichia coli* K-12 W3110 and *Lactobacillus*  
26 *plantarum* WCFS1 as queries were performed and estimated values (e-values) were  
27 calculated (we used e-value < 10<sup>-5</sup> as a cutoff value).

28 **Construction of  $\Delta folP$  and  $\Delta folP/\Delta pabABC$  mutants.** To examine the presence of  
29 an alternative pathway responsible for the formation of para-aminobenzoate (PABA),  
30 two *E. coli* mutants were constructed. One was a *folP*-disrupted mutant ( $\Delta folP$ ) and the  
31 other was *folP* and *pabABC*-disrupted mutant ( $\Delta folP/\Delta pabABC$ ). Both of the mutants  
32 were constructed by the Lambda Red System (2).

33 In the first step, two DNA fragments containing a chloramphenicol resistance (*cat*)  
34 and *sacB* gene encoding a sucrose from *Bacillus subtilis* were amplified with two sets of  
35 primers. The L and L-CS primers were designed to contain sequences specific to the  
36 upstream region of the target genes. The R and R-CS primers were designed for the  
37 downstream region of the target gene. The *cat-sacB* cassette was constructed by fusion  
38 PCR with L and R primers, and the thus amplified fragments were introduced into *E.*  
39 *coli* BW25113 harboring the pKD46 plasmid. After induction of recombinant enzymes

40 with arabinose, chloramphenicol (Cm<sup>r</sup>) resistant and sucrose sensitive colonies, in  
41 which the targeted gene was replaced with the *cat-sacB* cassette, were selected.

42 In the second step, DNA fragments, in which the target genes were deleted in-frame,  
43 were amplified. First, two DNA fragments carrying upstream and downstream regions  
44 of the target gene were amplified with the L/RL and R/LR primers. Second, a target  
45 gene-deleted fragment was amplified by fusion PCR with L and R primers. The fusion  
46 PCR fragment was introduced into the strain constructed by the first step to replace the  
47 *cat-sacB* cassette. Then, Cm<sup>r</sup> sensitive and sucrose resistant colonies were selected and  
48 gene-disruptions were confirmed by PCR. In the case of *folP* disruption, the *cat-sacB*  
49 cassette was inserted between *folP* and the upstream gene, *ftsH*. A  $\Delta folP/\Delta pabABC$   
50 mutant was constructed from the  $\Delta folP$  mutant by the same method as described above.  
51 The *pabC*, *pabB*, and *pabA* genes were successively disrupted (Supporting Fig. 1). The  
52 primers for their cassettes or fragments for disruption are shown in Supporting Table 4.

53 **Complementation of  $\Delta folP$  and  $\Delta folP/\Delta pabABC$  mutants by the plasmids**  
54 **carrying *E. coli folP* and *LAF\_1336*.** DNA fragments containing the *E. coli folP* gene  
55 and *LAF\_1336* gene were amplified by PCR with the primers 5'-  
56 TTTGAATTCAGATGCTCTCATGAAATATGAGACTATCGACGC-3', 5'-  
57 TTTAAGCTTTTACTCATAGCGTTTGTTCCTTTGCAGACAG-3' and 5'-  
58 TTTGGATCCGGGAATTTACGATGGAAACCTGGGTCAGTC-3', 5'-  
59 TTTAAGCTTTTACAGTTGCCAGTAACCACTGGTAATCGTGTC-3', respectively.  
60 After sequence confirmation, each of the fragments was inserted into *EcoRI-HindIII* and  
61 *BamHI-HindIII* digested pUC118 to construct pUC118-FolP and pUC118-1336, in  
62 which the *folP* gene and *LAF\_1336* could be expressed under the control of the native  
63 promoter. The constructed plasmids were introduced into the  $\Delta folP$  and  $\Delta folP/\Delta pabABC$   
64 mutants and the growth of the transformants on a minimal medium (M9 medium), in  
65 which folic acid or PABA was added if necessary, was examined.

66 **A sequential enzymatic assay with the FolK and the LAF\_1336 (FolP).** The *E. coli*  
67 *folK* gene was amplified by PCR with the primers,  
68 5'-TTTGGATCCACAGTGGCGTATATTGCCATAGG-3' and  
69 5'-TTTAAGCTTTTACCATTTGTTTAATTTGTCAAATGCTCTTGTATG -3'. After  
70 sequence confirmation, a 0.5 kb fragment was inserted into the same site of pQE30. A  
71 plasmid, pQE30-FolK, in which a recombinant protein was expressed as an *N*-terminal  
72 6 × His-tagged fusion protein, was selected. The *LAF\_1336 (FolP)* gene was also  
73 amplified by PCR with 5'-TTTGGATCCCCAACCACCACGGACGCCTTTAACCA  
74 -3' and 5'-TTTAAGCTTTTACAGTTGCCAGTAACCACTGGTAATCGTGTC-3'.  
75 After sequence confirmation, the fragment was inserted into the *Bam*HI and *Hind*III  
76 sites of pMAL-c2X to construct pMAL-1336. *N*-Terminal His-tagged *E. coli* FolK and  
77 maltose binding protein (MBP)-fused LAF\_1336 were expressed in *E. coli* and purified  
78 by a Ni-nitrilotriacetic acid column and amylose affinity column (Supporting Fig. 2)  
79 These recombinant enzymes were used for an *in vitro* enzyme assay. The reaction  
80 mixture (100 µl) contained 5 mM 6-hydroxymethyl-dihydropterin, 10 mM ATP, 1mM  
81 MgCl<sub>2</sub>, 0.5% (v/v) 2-mercaptoethanol, 1 mM PABA, 50 mM Tris-HCl (pH 8.0), and  
82 220 µg/ml of the purified His-tagged FolK and 80µg/ml of the purified MBP-fused  
83 LAF\_1336 (FolP). The formation of 7,8-dihydropteroate was examined by liquid  
84 chromatography (LC) and LC-mass-spectrometry analysis. The HPLC conditions  
85 involved a mobile phase where the concentration of acetonitrile in 20 mM potassium  
86 phosphate (pH 2.5) was stepwise increased (0–5 min, 0%; 6 min, 8%; 15 min 20%; 16  
87 min, 80%; 17–25 min, 0%) on a Mightisil RP-18 GP column (250 × 4.6 mm) with a  
88 flow rate of 1.5 ml/min and detection at 210 nm.

89  
90  
91

Supporting Table 1. Growth of *Lactobacillus* strains in single-amino-acid-omitted medium.

| Amino acids omitted | <i>L. fermentum</i>      | <i>L. reuteri</i>        | <i>L. brevis</i>         |
|---------------------|--------------------------|--------------------------|--------------------------|
| His                 | N (O) <sup>a</sup>       | E (X)                    | E (X)                    |
| Ser                 | N (O ← Cys) <sup>b</sup> | E (X)                    | E (X)                    |
| Cys                 | N (O ← Ser) <sup>b</sup> | N (O ← Ser) <sup>b</sup> | E (X)                    |
| Gly                 | N (O)                    | N (O ← Ser) <sup>b</sup> | E (O) <sup>f</sup>       |
| Ala                 | N (O)                    | N (O)                    | N (O)                    |
| Val                 | E (X) <sup>c</sup>       | E (X)                    | E (X)                    |
| Leu                 | E (X)                    | E (X)                    | E (X)                    |
| Asp                 | N (O)                    | N (O)                    | N (O ← Asn) <sup>g</sup> |
| Asn                 | N (O)                    | N (O)                    | N (O ← Asp) <sup>g</sup> |
| Lys                 | N (O)                    | N (O)                    | E (X)                    |
| Met                 | E (O) <sup>d</sup>       | E (O) <sup>d</sup>       | E (X)                    |
| Thr                 | E (O) <sup>d</sup>       | E (X)                    | E (X)                    |
| Iso                 | E (X)                    | E (X)                    | E (X)                    |
| Try                 | E (X)                    | E (X)                    | E (X)                    |
| Tyr                 | E (X)                    | E (X)                    | E (X)                    |
| Phe                 | E (X)                    | E (X)                    | E (X)                    |
| Glu                 | N (X ← Gln) <sup>e</sup> | N (O ← Gln) <sup>e</sup> | E (X)                    |
| Gln                 | N (O ← Glu) <sup>e</sup> | N (O ← Glu) <sup>e</sup> | N (O ← Glu) <sup>e</sup> |
| Pro                 | N (O)                    | N (O)                    | E (X)                    |
| Arg                 | E (X)                    | E (X)                    | E (X)                    |

<sup>a</sup> N; Non-essential (grow without the amino acid), O; presence of whole set of biosynthetic genes.

<sup>b</sup> Ser, Cys, and Gly would be synthesized from Cys, Ser, and Ser by inter-conversions, respectively.

<sup>c</sup> E; Essential (not grow without the amino acid), X; absence of at least one biosynthetic gene.

<sup>d</sup> Some genes responsible for the formation of Thr /Met from homoserine would be non-functional or pseudo genes.

<sup>e</sup> Glu (Gln) would be synthesized from Gln (Glu) by inter-conversion.

<sup>f</sup> Glycine hydroxymethyltransferase (EC 2.1.2.1, *gltA*) gene would be non-functional.

<sup>g</sup> Asn (Asp) would be synthesized from Asp (Asn) by inter-conversion.

Supporting Table 2. Growth of *Lactobacillus* strains in single-purine/pyrimidine-omitted medium.

| Purine/Pyrimidine | <i>L. fermentum</i> | <i>L. reuteri</i>  | <i>L. brevis</i> |
|-------------------|---------------------|--------------------|------------------|
| Purine            | N (O)               | E (O) <sup>a</sup> | E (X)            |
| Pyrimidine        | N (O)               | N (O)              | E (X)            |

<sup>a</sup> some genes responsible for the formation of IMP from PRPP would be nonfunctional or pseudogene (require IMP for the growth).

Supporting Table 3. Growth of *Lactobacillus* strains in single-vitamin-omitted medium.

| Vitamine               | <i>L. fermentum</i> | <i>L. reuteri</i>  | <i>L. brevis</i>   |
|------------------------|---------------------|--------------------|--------------------|
| Thiamine               | E (X) <sup>a</sup>  | E (X) <sup>a</sup> | E (X) <sup>a</sup> |
| Nicotinate (NAD, NADP) | E (X)               | E (X)              | E (X)              |
| Panθοthenate (CoA)     | E (X)               | E (X)              | E (X)              |
| Riboflavin (FMN, FAD)  | N (O)               | N (O)              | N (O)              |
| Vitamin B6 (PLP etc.)  | S (X) <sup>b</sup>  | E (X)              | E (X)              |
| Folic acid (THF)       | N (X) <sup>c</sup>  | N (X) <sup>b</sup> | E (X)              |

<sup>a</sup> Presence of most of the orthologs but lacked orthologs of ThiC

<sup>b</sup> S; growth stimulate effect.

<sup>c</sup> Absence of the genes responsible for the formation of *p*-aminobenzoate from chorismate

Supporting Table 4. Primers used for *ΔfolP* and *ΔfolP/ΔpabABC* mutants

|                              |                              |                                                                   |                                                               |
|------------------------------|------------------------------|-------------------------------------------------------------------|---------------------------------------------------------------|
| pabA (cat-sacB cassette)     | 1st step                     | L                                                                 | AACAACACTACCTTTCACCGCGTCATTCCT                                |
|                              | 2nd step (in-frame deletion) | L-CS                                                              | GTGCTACGCCTGAATAAGTGCGGCCGCctgtagaggtccaggtaaagaatcgta        |
|                              |                              | R-CS                                                              | CGCAAAGAAAATGCCGATATGCGGCCGCattcttagcgaacaaggacatcaactgctg    |
|                              |                              | R                                                                 | GTTGCATCCCTTCATCGATATCCGCATCTT                                |
| 2nd step (in-frame deletion) | RL                           | cagcagttgatgtccttgttcgctaagaatCTGGTAGAGGTTCCAGGTAAGAATCGTA        |                                                               |
|                              | LR                           | TACGATTCTTTTACCTGGAACCTCTACCAGattcttagcgaacaaggacatcaactgctg      |                                                               |
| pabB (cat-sacB cassette)     | 1st step                     | L                                                                 | accaagttcgaatgaaagcagggcgaa                                   |
|                              | 2nd step (in-frame deletion) | L-CS                                                              | GTGCTACGCCTGAATAAGTGCGGCCGCagtaatcacagcgggagataacttctcat      |
|                              |                              | R-CS                                                              | CGCAAAGAAAATGCCGATATGCGGCCGCaatcgtatcctgaagcaactggagaagtaa    |
|                              |                              | R                                                                 | cacgataatactcctgacaaggtgactgga                                |
| 2nd step (in-frame deletion) | RL                           | ttacttctccagttgcttcaggatacattAGTAATCACAGCGGGAGATAACGTCTTCAT       |                                                               |
|                              | LR                           | ATGAAGACGTTATCTCCCGCTGTGATTACTaatcgtatcctgaagcaactggagaagtaa      |                                                               |
| pabC (cat-sacB cassette)     | 1st step                     | L                                                                 | aatcaccaccgttcaggctgccattga                                   |
|                              | 2nd step (in-frame deletion) | L-CS                                                              | GTGCTACGCCTGAATAAGTGCGGCCGCcagcagttctgcttataacegtaattaagaacat |
|                              |                              | R-CS                                                              | CGCAAAGAAAATGCCGATATGCGGCCGCccactttgtgagcgeccgaattag          |
|                              |                              | R                                                                 | cgaaagactcttgcataacgatccagct                                  |
| 2nd step (in-frame deletion) | RL                           | TGCTGACGAAAAGGAGACATCGCCccgategcttactgccagcagttc                  |                                                               |
|                              | LR                           | gaatcgctggcagtaagcagatcggGGCGATGTCTCCTTTTCGTCAGCA                 |                                                               |
| folP (cat-sacB cassette)     | 1st step                     | L                                                                 | aactggaaagccagatttctacgtgtacg                                 |
|                              | 2nd step (in-frame deletion) | L-CS                                                              | GTGCTACGCCTGAATAAGTGCGGCCGCttacttgtcgcttaactgctctgacatggt     |
|                              |                              | R-CS                                                              | CGCAAAGAAAATGCCGATATGCGGCCGCgttcccgcacagatgactgtattgtacc      |
|                              |                              | R                                                                 | ttttcagccagcacagcagcctgga                                     |
| 2nd step (in-frame deletion) | RL                           | ttactcatagcgtttgtttcctttgcagacagagtCAGTGAAGTACCCTGGGCAAAGAGTTTCAT |                                                               |
|                              | LR                           | ATGAAACTCTTTGCCAGGGTACTTCACTGactctgtctgcaaaggaaaacaacgctatgagtaa  |                                                               |



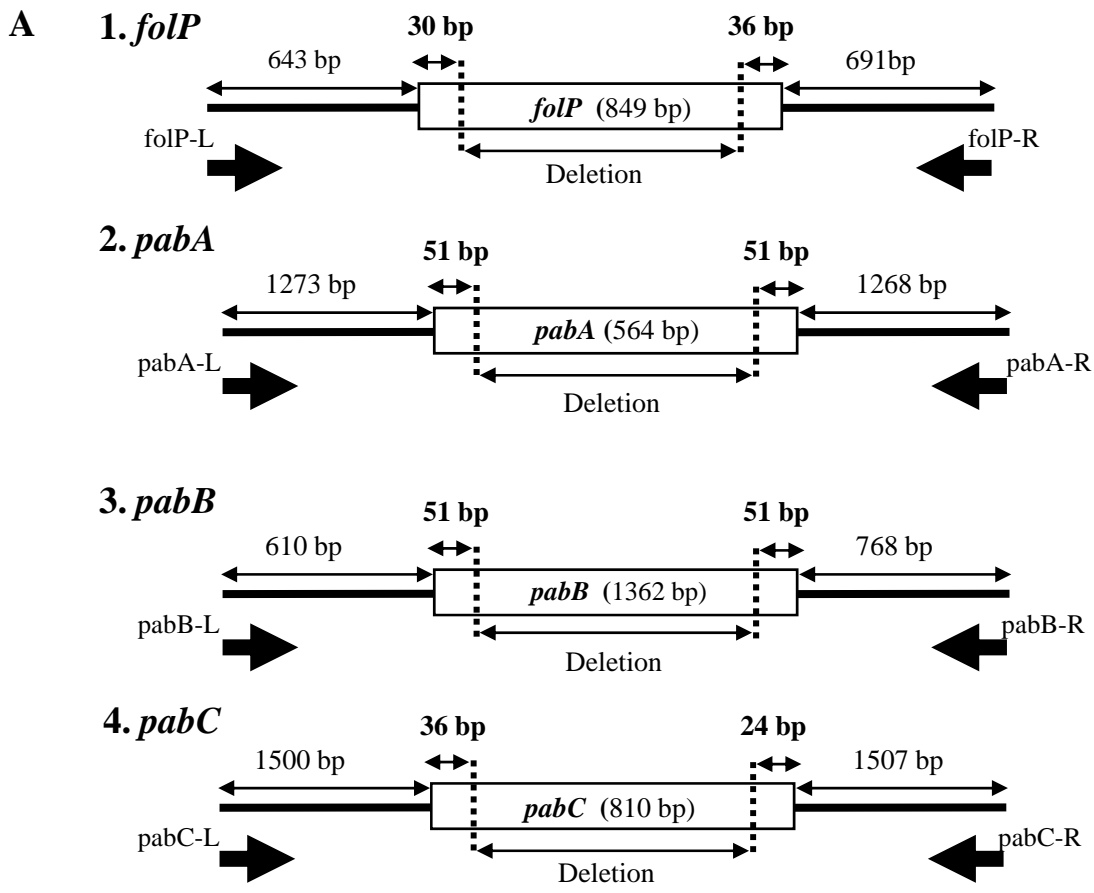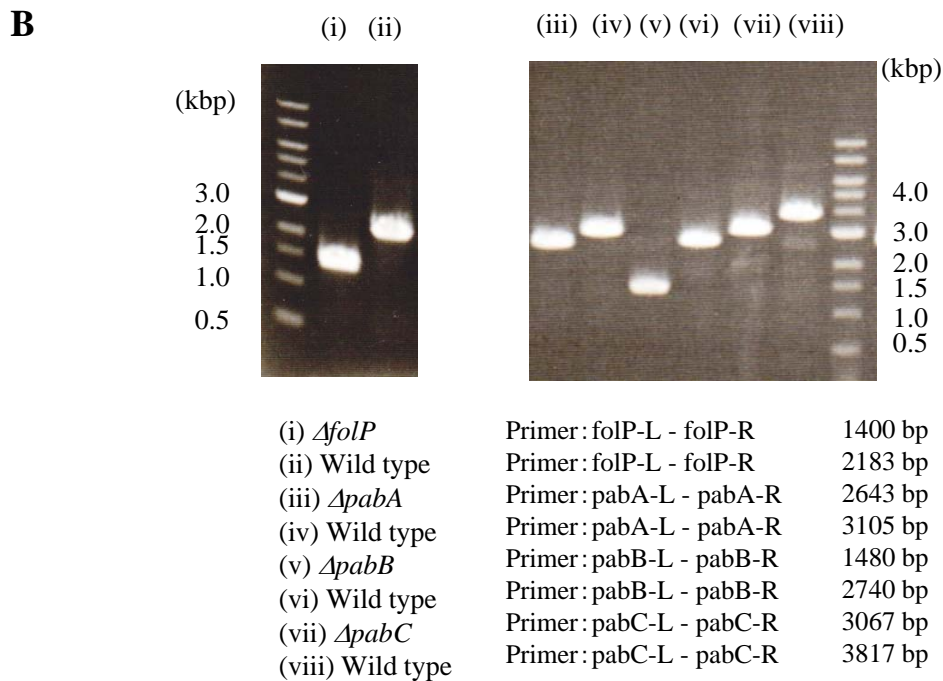

**Supporting Fig. 1.** The *folP*, *pabA*, *pabB*, and *pabC* genes and their flanking regions are shown (A). PCR analysis of the Genomic DNA of the constructed mutants (B).

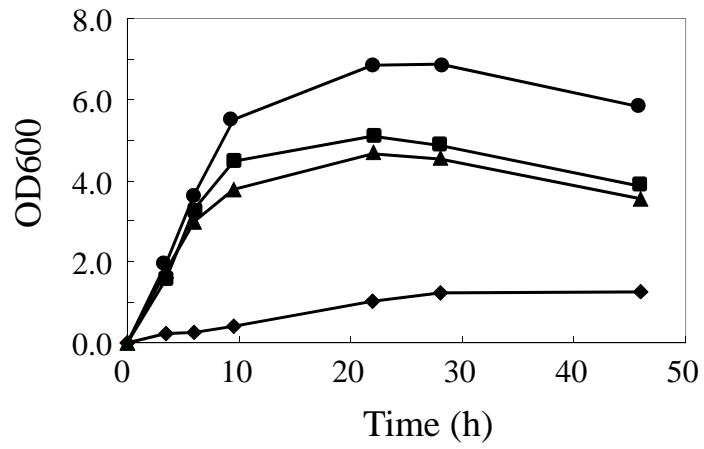

**Supporting Fig.2.** Growth of the  $\Delta folP$  mutant harboring pUC118 (diamond), wild type strain harboring pUC118 in the presence of folic acid (triangle),  $\Delta folP$  mutant harboring pUC118 carrying the *folP* gene cloned from *E. coli* (square), and  $\Delta folP$  mutant harboring pUC118 carrying the *folP* gene cloned from *L. fermentum* IFO 3956 (*LAF\_1336*) (circle) in Luria broth containing ampicillin was measured.

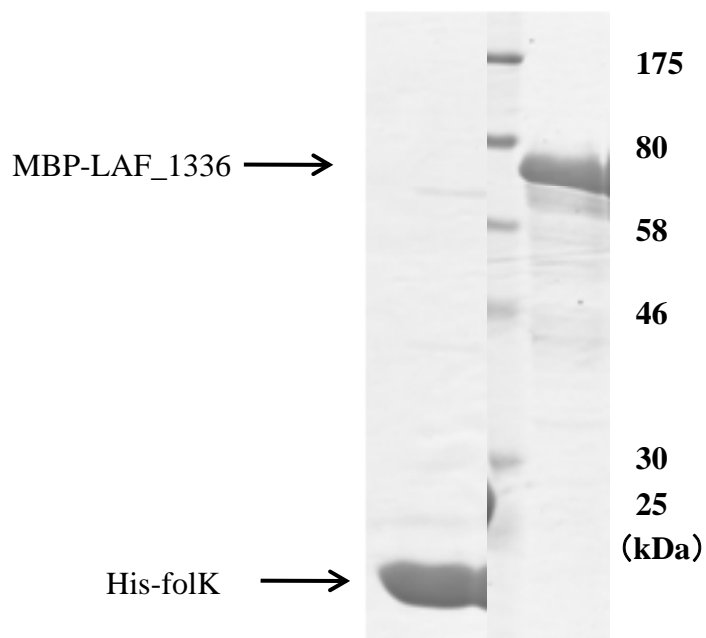

**Supporting Fig. 3.** Electrophoresis of the overproduced and purified *E coli* FolK and LAF\_1336 (FolP)

92

## REFERENCES

93

94 1. **Datsenko, K. A., and B. L. Wanner.** 2000. One-step inactivation of chromosomal  
95 genes in *Escherichia coli* K-12 using PCR products. Proc. Natl. Acad. Sci. USA  
96 **97**:6640-6645.

97 2. **Pearson, W.R., and D. J. Lipman.** 1988. Improved tools for biological sequence  
98 comparison. Proc. Natl. Acad. Sci. USA **85**:2444-2448.
